# Supplementary material for: Zona glomerulosa cells of the mouse adrenal cortex are intrinsic electrical oscillators
Source: JCI journal article supplement (doi:10.1172/jci61996), 2012-05-01
Supplement: sd1 [file 1]

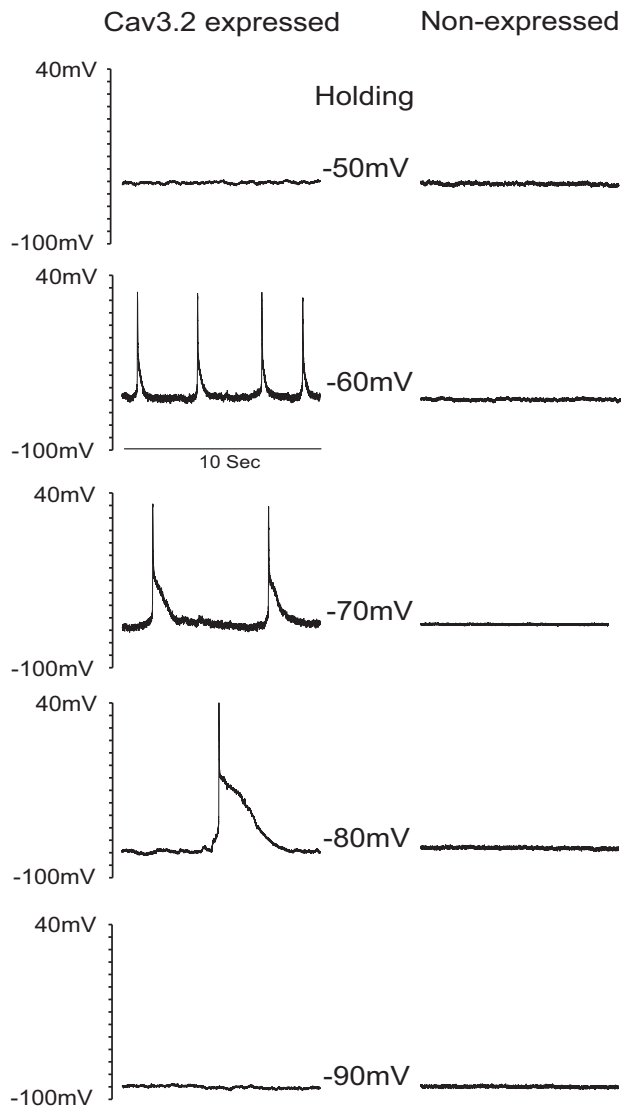

### Supplemental Figure 1

Cav3.2 current expression in H295R cells permits voltage oscillations. Representative current-clamp recordings from H295R cells that express (left) or lack (right) Cav3.2 channels. DC current injection produces analogue shifts in baseline Vm from -90 to -50 mV. Between baseline values of -60 to -80 mV, Vm oscillations were evident with Cav3.2 channel expression.

**A**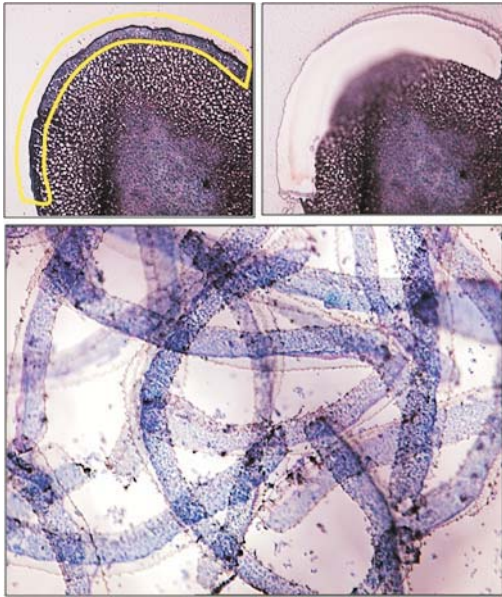**B**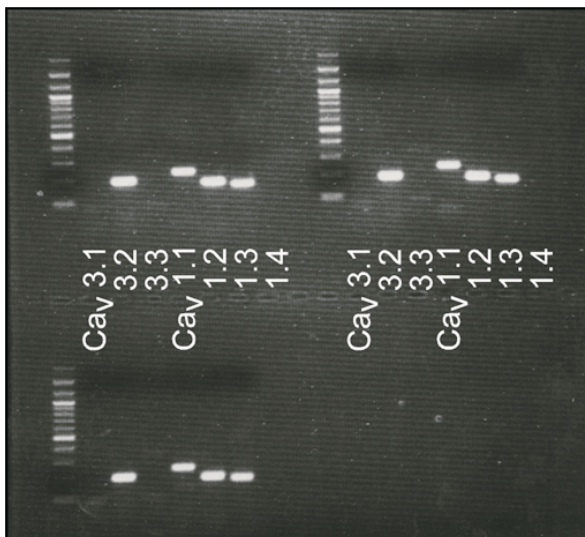**Supplemental Figure 2.**

Mouse ZG cells express mRNA for Cav3.2 channels. **(A)** Zona glomerulosa with adherent capsule was isolated using laser capture microdissection. Zona fasciculata contamination was minimal. **(B)** qRT-PCR revealed message for T-type  $\text{Ca}^{2+}$  channels: (Cav3.2 but not Cav3.1 or Cav3.3) and L-type  $\text{Ca}^{2+}$  channels (Cav1.1, Cav 1.2, and Cav 1.3 , but not Cav1.4). Data from three adrenals from 3 mice.

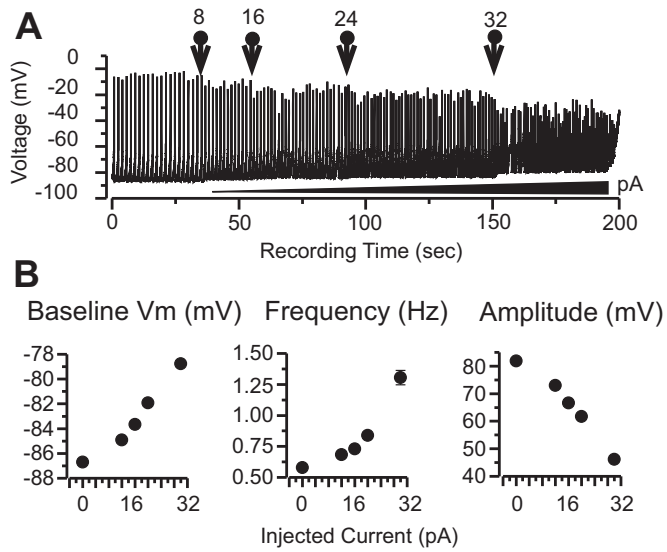

### Supplemental Figure 3

Baseline Vm changes firing frequency and peak amplitude. **(A)** A representative current clamp recording showing changes in ZG cell oscillatory behavior with DC current injection from 0 to 32 pA. Arrows indicate times of injection **(B)** Delivery of depolarizing current produced incremental changes in baseline Vm (mV), oscillation frequency (Hz) and peak amplitude (mV).
